# Supplementary material for: Switches, stability and reversals in the evolutionary history of sexual systems in fish
Source: PubMed Central journal article supplement (PMC9151764; doi:10.1038/s41467-022-30419-z), 2022-05-30
Supplement: 41467_2022_30419_MOESM1_ESM.pdf [file 41467_2022_30419_MOESM1_ESM.pdf]

## Supplementary information for

# Switches, stability and reversals in the evolutionary history of sexual systems in fish

### Supplementary tables

**Supplementary Table 1.** Results of the RJ-MCMC Multistate analysis in *BayesTraits* of sexual systems as a binary trait: gonochorism (G) or hermaphroditism (H). For each posterior distribution, we report the effective sample size (ESS), the mean and 95% high posterior density (95-HPD) intervals, the mode, and the percentage of models in which the parameter is estimated as zero. Analysis based on 4614 extant teleost species (G: n = 4320; H: n = 294)

| Transition rates          | ESS  | Mean  | 95-HPD        | Mode  | %<br>Zero |
|---------------------------|------|-------|---------------|-------|-----------|
| G → H                     | 1600 | 0.034 | 0.021 – 0.047 | 0.032 | <b>0</b>  |
| H → G                     | 1600 | 0.826 | 0.608 – 1.038 | 0.823 | <b>0</b>  |
| <b>Root probabilities</b> |      |       |               |       |           |
| G                         | 1600 | 66.0  | 59.1 – 74.1   | 65.1  | <b>0</b>  |
| H                         | 1600 | 34.0  | 25.9 – 40.9   | 34.9  | <b>0</b>  |

**Supplementary Table 2.** Results of phylogenetic generalized least square (PGLS) model of longevity (year;  $\log_{10}$  transformed), controlled for allometry (maximum length, in cm;  $\log_{10}$  transformed; age at first maturity (year;  $\log_{10}$  transformed) per each sex ( $\sigma$ : male;  $\phi$ : female), controlling for allometry (length at first maturity in cm;  $\log_{10}$  transformed); and male gonadosomatic index (GSI;  $\log_{10}$  transformed), controlling for allometry (male length at first maturity in cm;  $\log_{10}$  transformed) across sexual systems: gonochorism (G); protogyny (PG); protandry (PA). For each independent variable we report the parameter estimate (Beta), t-statistics (T), *P*-value (*P*; two-sided test), and the model statistics including the degrees of freedom (df), the maximum likelihood estimation of the phylogenetic signal ( $\lambda$ ) and  $R^2$ . Significant differences are indicated in bold. See Supplementary Table 3 for sexual system and sex-specific data

| Dependent                      | Variable                        | Beta   | T      | <i>P</i>                   | Df     | Model statistics |       |
|--------------------------------|---------------------------------|--------|--------|----------------------------|--------|------------------|-------|
|                                | Independent                     |        |        |                            |        | $\lambda$        | $R^2$ |
| Longevity                      | Max length                      | 0.680  | 19.968 | $< 2^{-16}$                | 3; 640 | 0.864            | 0.388 |
|                                | Sexual system - PA <sup>1</sup> | -0.043 | -0.417 | 0.677                      |        |                  |       |
|                                | Sexual system - PG <sup>1</sup> | 0.129  | 2.193  | <b>0.029</b>               |        |                  |       |
|                                | Sexual system - PG <sup>2</sup> | 0.172  | 1.538  | 0.124                      |        |                  |       |
| Age at first maturity $\sigma$ | Length at maturity $\sigma$     | 0.602  | 8.360  | <b>4.086<sup>-14</sup></b> | 3; 149 | 0.785            | 0.325 |
|                                | Sexual system - PA <sup>1</sup> | -0.090 | -0.956 | 0.340                      |        |                  |       |
|                                | Sexual system - PG <sup>1</sup> | 0.068  | 0.774  | 0.440                      |        |                  |       |
|                                | Sexual system - PG <sup>2</sup> | 0.159  | 1.434  | 0.154                      |        |                  |       |
| Age at first maturity $\phi$   | Length at maturity $\phi$       | 0.536  | 8.062  | <b>1.408<sup>-13</sup></b> | 3; 166 | 0.829            | 0.282 |
|                                | Sexual system - PA <sup>1</sup> | 0.016  | 0.117  | 0.907                      |        |                  |       |
|                                | Sexual system - PG <sup>1</sup> | -0.014 | -0.167 | 0.867                      |        |                  |       |
|                                | Sexual system - PG <sup>2</sup> | -0.029 | -0.217 | 0.828                      |        |                  |       |
| GSI $\sigma$                   | Length at maturity $\sigma$     | 0.041  | 0.236  | 0.814                      | 3; 51  | 0.000            | 0.376 |
|                                | Sexual system - PA <sup>1</sup> | 0.164  | 1.197  | 0.237                      |        |                  |       |
|                                | Sexual system - PG <sup>1</sup> | -0.513 | -4.631 | <b>2.547<sup>-05</sup></b> |        |                  |       |
|                                | Sexual system - PG <sup>2</sup> | -0.678 | -4.582 | <b>2.999<sup>-05</sup></b> |        |                  |       |

**Supplementary Table 3.** Sample sizes for longevity (year), maximum length (cm), age at first maturity (years), length at first maturity (cm) and gonadosomatic index (GSI) for each sexual system with sex-specific male (♂) and female (♀) data, when available. In italics data not used in the analyses. G = gonochorism; PG = protogyny; PA = protandry; SH = simultaneous hermaphroditism; BD = bidirectional hermaphroditism

| <b>Life-history traits</b> | <b>Sex</b> | <b>G</b> | <b>PG</b> | <b>PA</b> | <b>Total for analyses</b> | <b>SH</b> | <b>BD</b> |
|----------------------------|------------|----------|-----------|-----------|---------------------------|-----------|-----------|
| Longevity                  |            | 758      | 69        | 17        | 844                       | 7         | 3         |
| Maximum length             |            | 2612     | 167       | 20        | 2799                      | 28        | 11        |
| Age at first maturity      | ♂          | 259      | 15        | 9         | 283                       | 1         | -         |
|                            | ♀          | 282      | 30        | 5         | 317                       | 2         | -         |
| Length at first maturity   | ♂          | 305      | 42        | 15        | 362                       | 9         | -         |
|                            | ♀          | 297      | 36        | 10        | 343                       | 2         | -         |
| GSI                        | ♂          | 44       | 38        | 15        | 97                        | 3         | -         |

**Supplementary Table 4.** Number of species used to study the evolutionary transitions among different sexual systems. Note that androdioecious species are not included in the analyses

| <b>Sexual system</b>              | <b>2 state</b><br>[G, H] | <b>4 state</b><br>[G, PG, PA, SH] |
|-----------------------------------|--------------------------|-----------------------------------|
| Gonochorism [G]                   | 4320                     | 4320                              |
| Hermaphroditism [H]               | 294*                     |                                   |
| Protogyny [PG]                    |                          | 196                               |
| Protandry [PA]                    |                          | 36                                |
| Simultaneous hermaphroditism [SH] |                          | 46                                |
| Total                             | 4614                     |                                   |

\*Includes 16 species of bidirectional sequential hermaphrodites, which were not included in other analyses due to their small sample size when added as a separate category.

## Supplementary figure

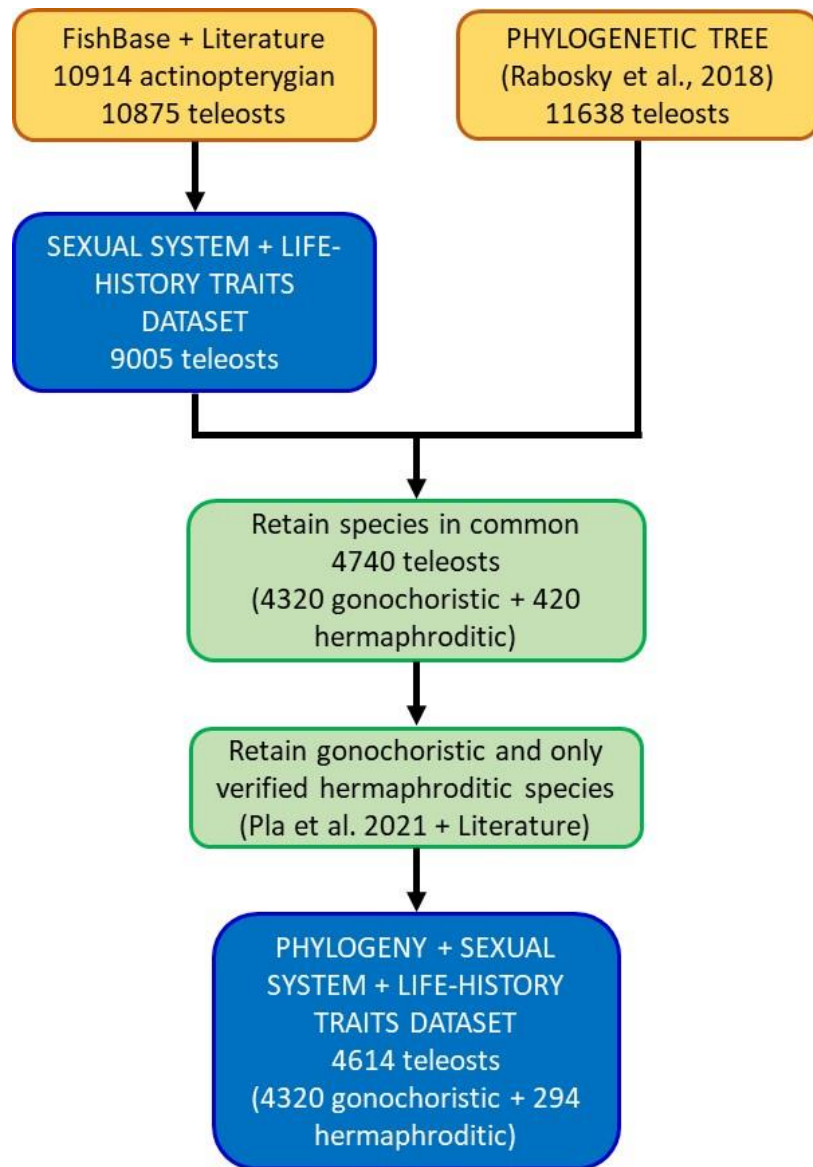

**Supplementary Figure 1.** Diagram of the data acquisition and curation followed in this study.
