# Supplementary material for: Switches, stability and reversals in the evolutionary history of sexual systems in fish
Source: PubMed Central journal article supplement (PMC9151764; doi:10.1038/s41467-022-30419-z), 2022-05-30
Supplement: 41467_2022_30419_MOESM3_ESM.pdf [file 41467_2022_30419_MOESM3_ESM.pdf]

### **Description of Additional Supplementary Files**

File Name: Supplementary Data 1

Description: Excel file listing all the species used with information on sexual system and life history plus reference list to the primary literature supporting functional hermaphroditism in fish.
